# Supplementary material
Source: PubMed Central journal article supplement (PMC4388041)
Supplement: NIHMS676496-supplement-Supplement.pdf [file NIHMS676496-supplement-Supplement.pdf]

## Supplementary Materials and Results

Table S1: Primer sequences for *CYP11A1* and growth factor genes from this study

|                |                                   |
|----------------|-----------------------------------|
| <i>CYP11A1</i> | 5' -GATTGAGCACTGTCAGGAGAAGC- 3'   |
|                | 5' -ATGAGGCTCCAGGAGATAGCAG- 3'    |
| <i>AREG</i>    | 5' -GCACCTGGAAGCAGTAACATGC- 3'    |
|                | 5' -GGCAGCTATGGCTGCTAATGCA- 3'    |
| <i>EREG</i>    | 5' -CTTATCACAGTCGTCGGTTCCAC- 3'   |
|                | 5' -GCCATTCAGACTTGCGGCAACT- 3'    |
| <i>FGF2</i>    | 5' -AGCGGCTGTACTGCAAAAACGG- 3'    |
|                | 5' -CCTTTGATAGACACAACCTCCTCTC- 3' |
| <i>PDGFA</i>   | 5' -CAGCGACTCCTGGAGATAGACT- 3'    |
|                | 5' -CGATGCTTCTTCTCCTCCGAATG- 3'   |

A

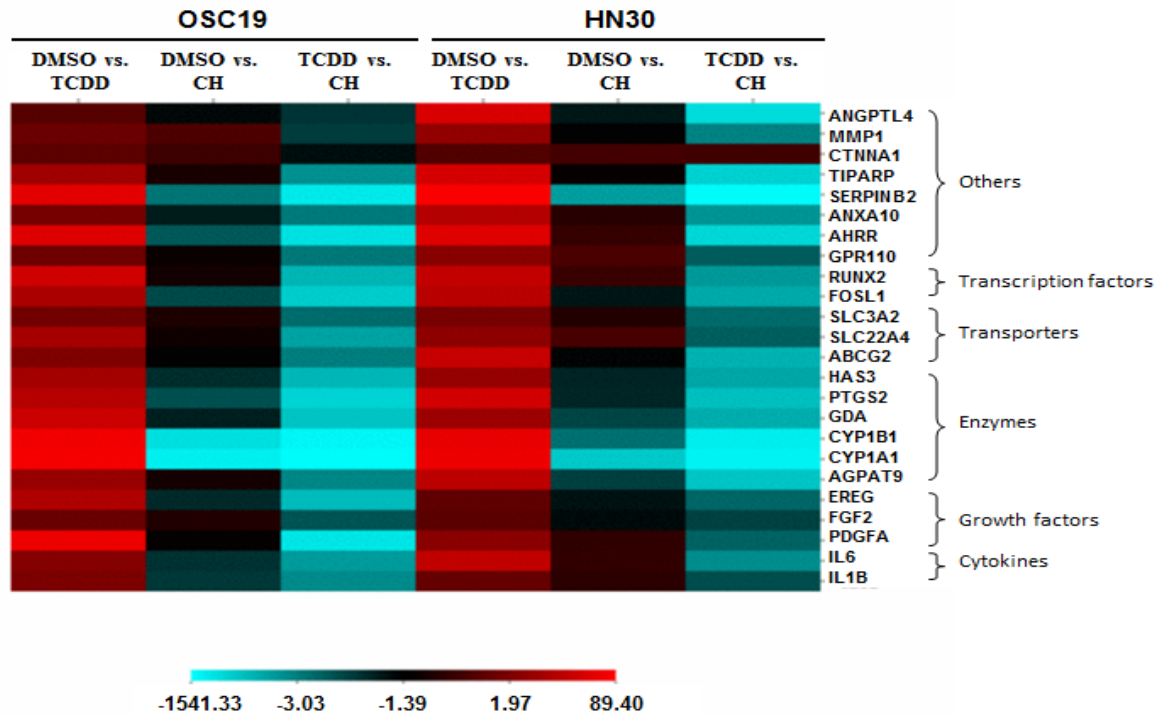

B

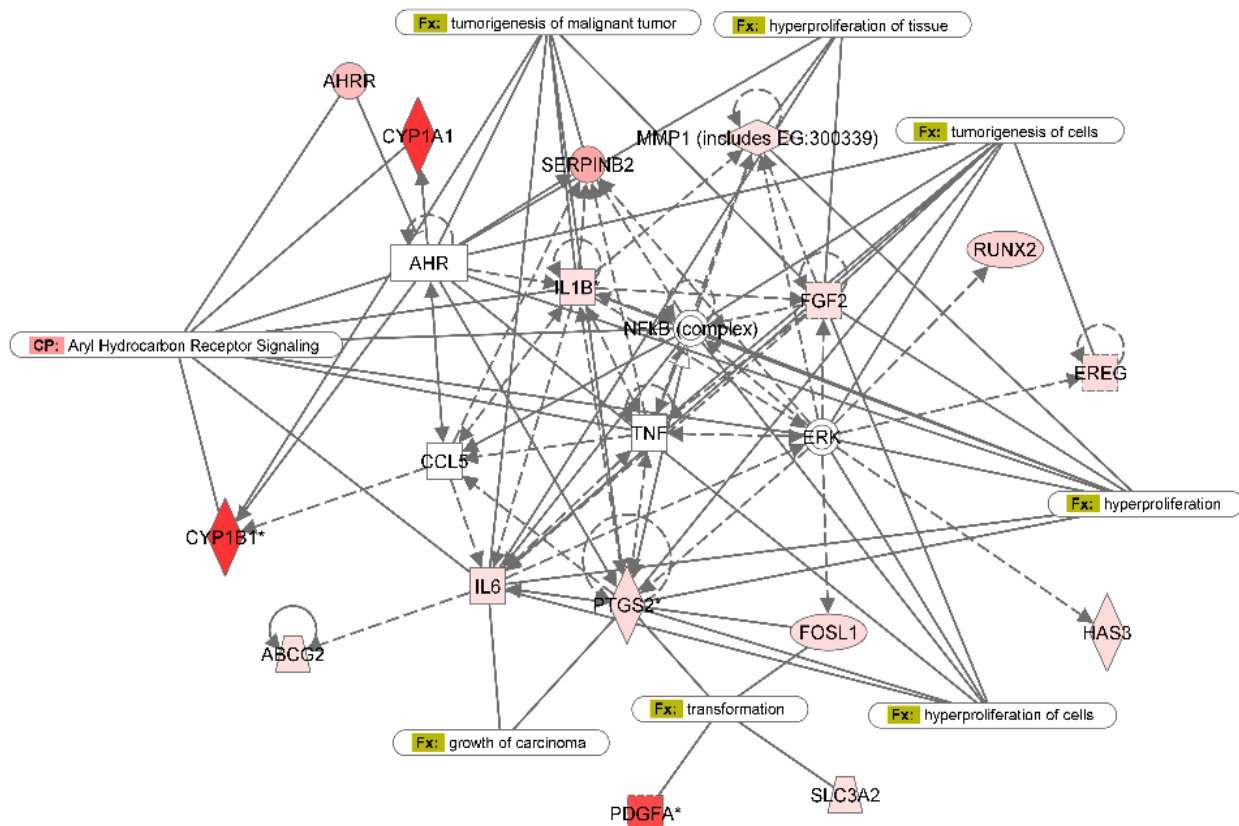

**Figure S1: Whole genome expression analysis of head and neck tumor cell lines following treatment with an AHR agonist and antagonist reveals putative AHR target genes altered in head and neck cancers**

(A) Gene expression patterns of 24 genes up-regulated following treatment with TCDD and significantly down-regulation by the AHR antagonist, CH223191, relative to cells treated with TCDD alone (B) Network mapping of these genes revealed seven genes to be unconnected to the network (not shown here). Among the remaining connected genes three were growth factor regulators whose expression was up-regulated by TCDD and subsequently down-regulated by CH223191 and hence considered for further analysis. AREG though absent in this gene-set was considered based on previous unpublished results from this lab. The legend to the different types of designations and interactions can be found in the Supplementary Figure S3.

## Network shape

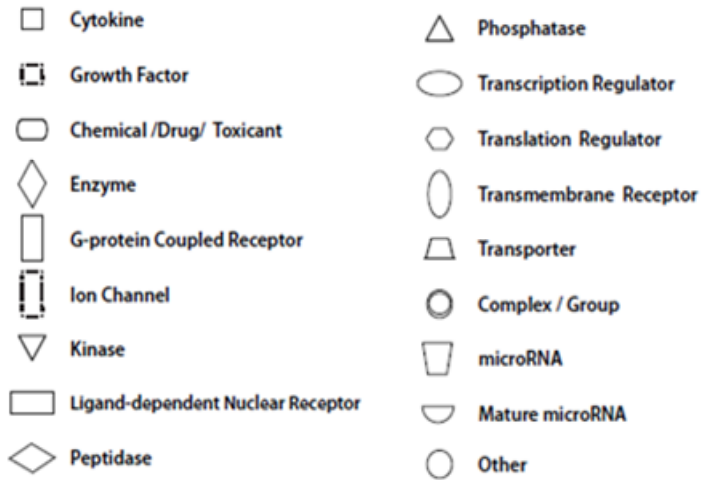

## Network relationship

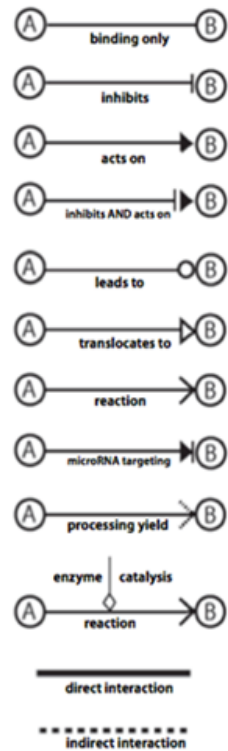

**Figure S2:** Legend to different designations and relationships used in the network analysis depicted in Figure S2

### OSC19

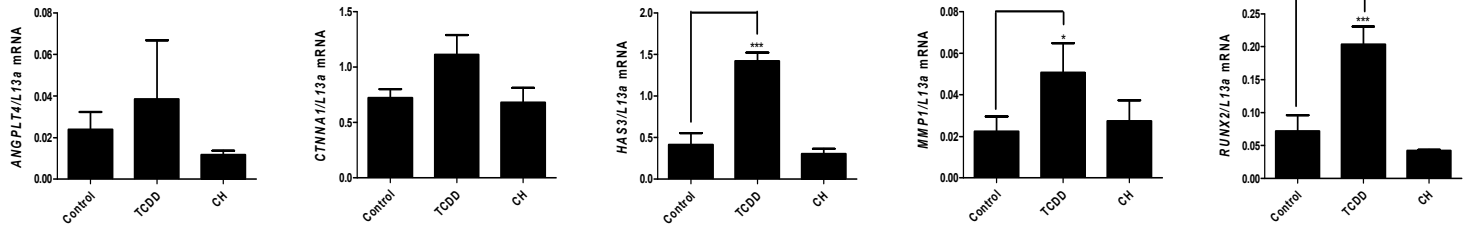

### HN30

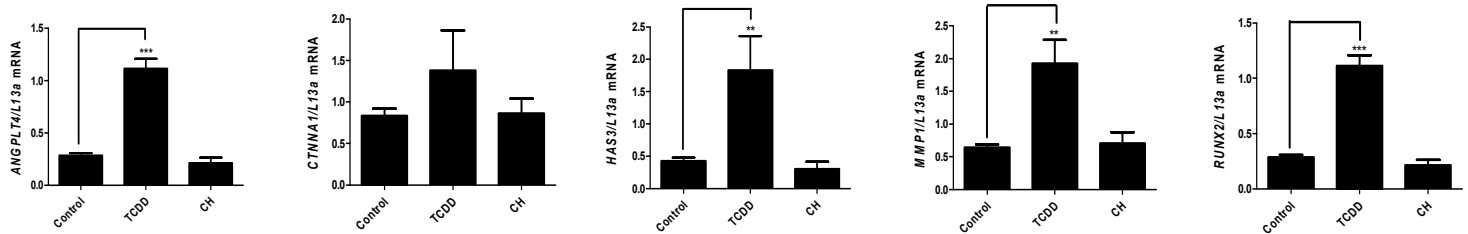

**Figure S3:** Validation of microarray gene expression patterns, for select genes, by qPCR analysis.

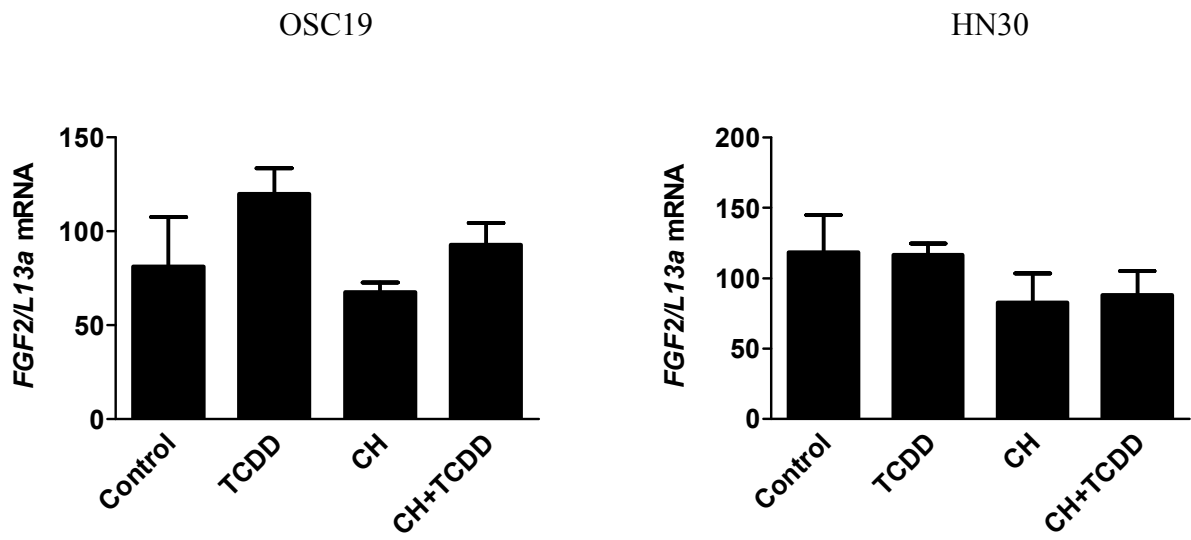

**Figure S4:** CH223191 fails to significantly attenuate basal and TCDD induced expression of *FGF2* in OSC19 and HN30 cells.

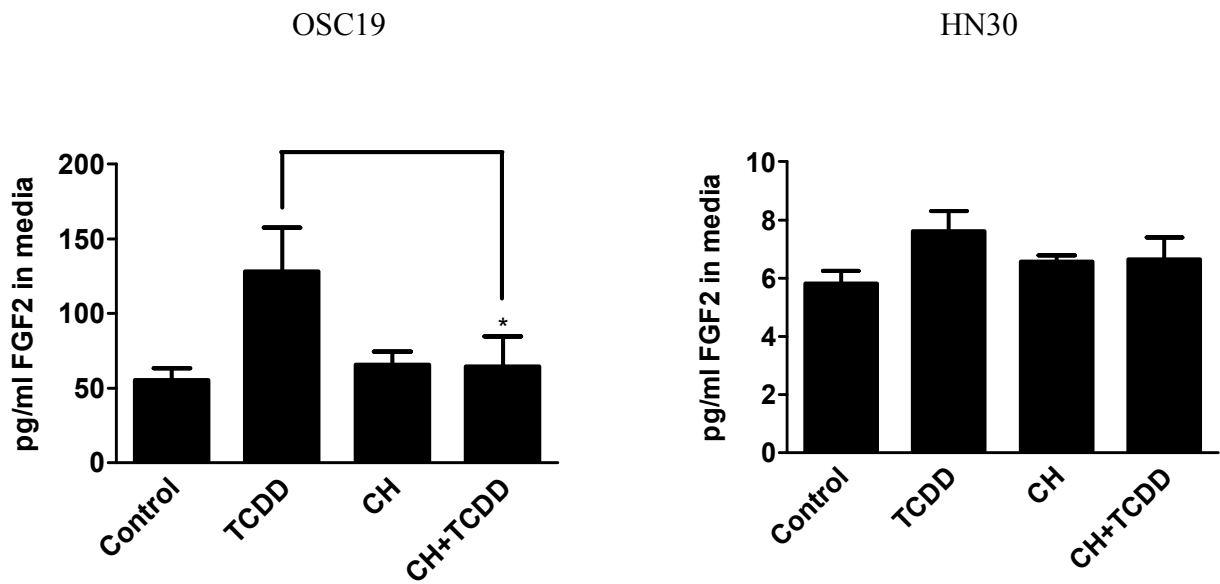

**Figure S5:** CH223191 significantly attenuated TCDD induced protein levels of FGF2 in OSC19 cells, but not in HN30 cells.

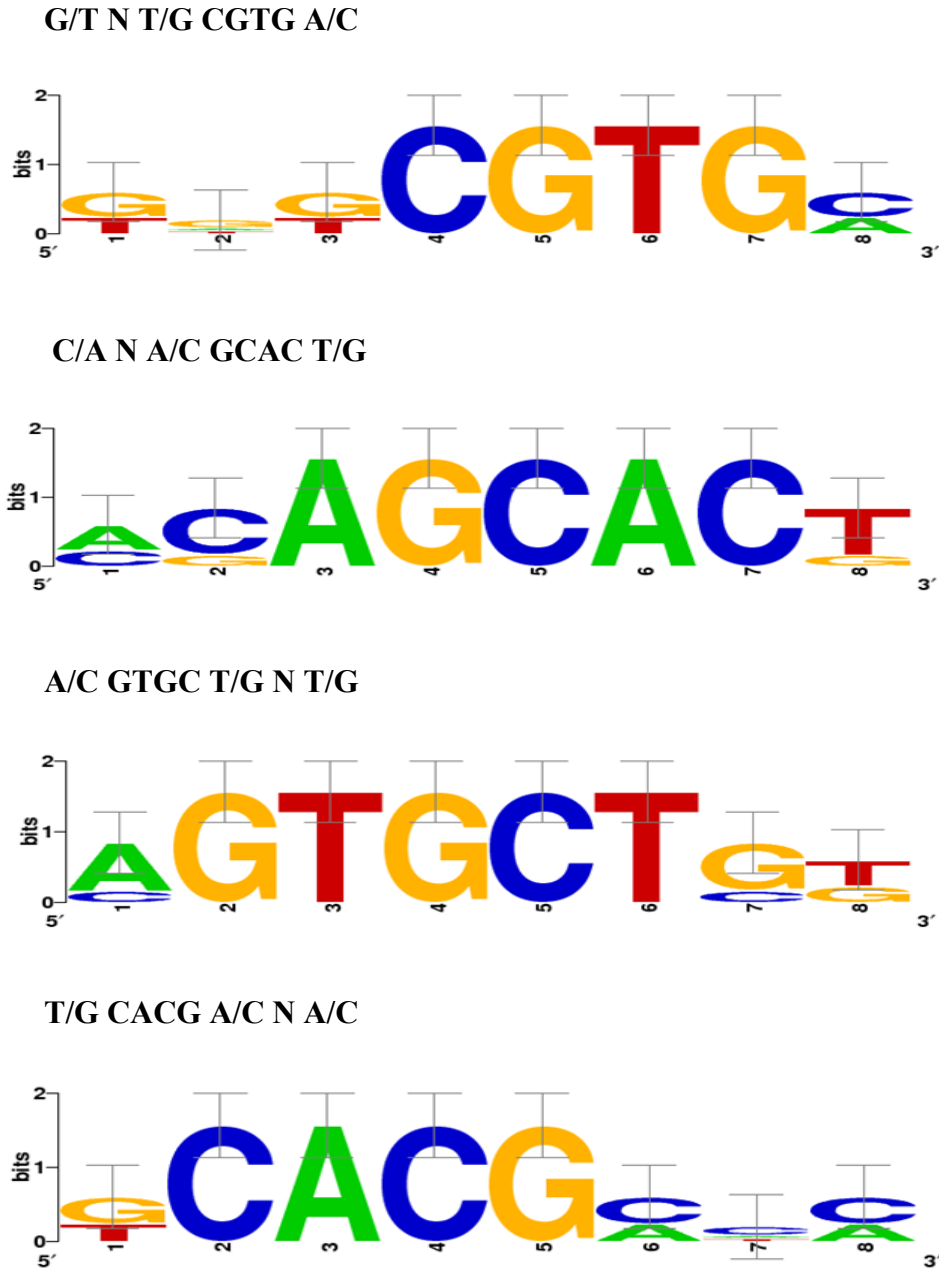

**Figure S6:** Sequence logos obtained following a scan of the promoter region (2500 bp upstream of transcription start site) of multiple growth factors for the presence of DRE-like sequences (G/T N T/G CGTG A/C), in all possible orientations, on both the plus and minus strand's of DNA. The various orientations of the DRE-like elements used for the searches are displayed above the respective logos. The March 2006 (NCBII36/hg18) assembly of the human genome was used for analysis.



**Table S2:** Location of the DRE-like consensus sequence (G/T N T/G CGTG A/C), in all possible orientations, in multiple growth factor genes examined in this study. 2500 bp upstream of the transcription start site was scanned *in silico* for the presence of these DRE-like elements. The various orientations of the DRE-like elements used for the searches are displayed above each table. The March 2006 (NCBII36/hg18) assembly of the human genome was used for analysis.

**G/T N T/G CGTG A/C**

| Site     | Strand | Location       | Gene  |
|----------|--------|----------------|-------|
| gggcgtga | -      | -1423 to -1430 | AREG  |
| tggcgtga | -      | -1547 to -1554 | EREG  |
| gacgtgc  | +      | -1276 to -1269 | FGF2  |
| tggcgtgc | -      | -1520 to -1527 | PDGFA |
| gttcgtgc | -      | -582 to -589   | PDGFA |

**C/A N A/C GCAC T/G**

| Site     | Strand | Location       | Gene  |
|----------|--------|----------------|-------|
| ccagcact | -      | -1311 to -1318 | AREG  |
| agagcact | +      | -1013 to -1006 | AREG  |
| ccagcact | -      | -1384 to -1391 | EREG  |
| acagcact | +      | -962 to -955   | FGF2  |
| acagcacg | +      | -1530 to -1523 | PDGFA |

**A/C GTGC T/G N T/G**

| Site    | Strand | Location       | Gene  |
|---------|--------|----------------|-------|
| agtgtgg | +      | -1318 to -1311 | AREG  |
| agtgtct | -      | -1006 to -1013 | AREG  |
| agtgtgg | +      | -1391 to -1384 | EREG  |
| agtgtgt | -      | -955 to -962   | FGF2  |
| cgtgtgt | -      | -1523 to -1530 | PDGFA |

**T/G CACG A/C N A/C**

| Site     | Strand | Location       | Gene  |
|----------|--------|----------------|-------|
| tcacgcc  | +      | -1430 to -1423 | AREG  |
| tcaccca  | +      | -1554 to -1547 | EREG  |
| gcacgate | -      | -1269 to -1276 | FGF2  |
| gcaccca  | +      | -1527 to -1520 | PDGFA |
| gcacgaac | +      | -589 to -582   | PDGFA |

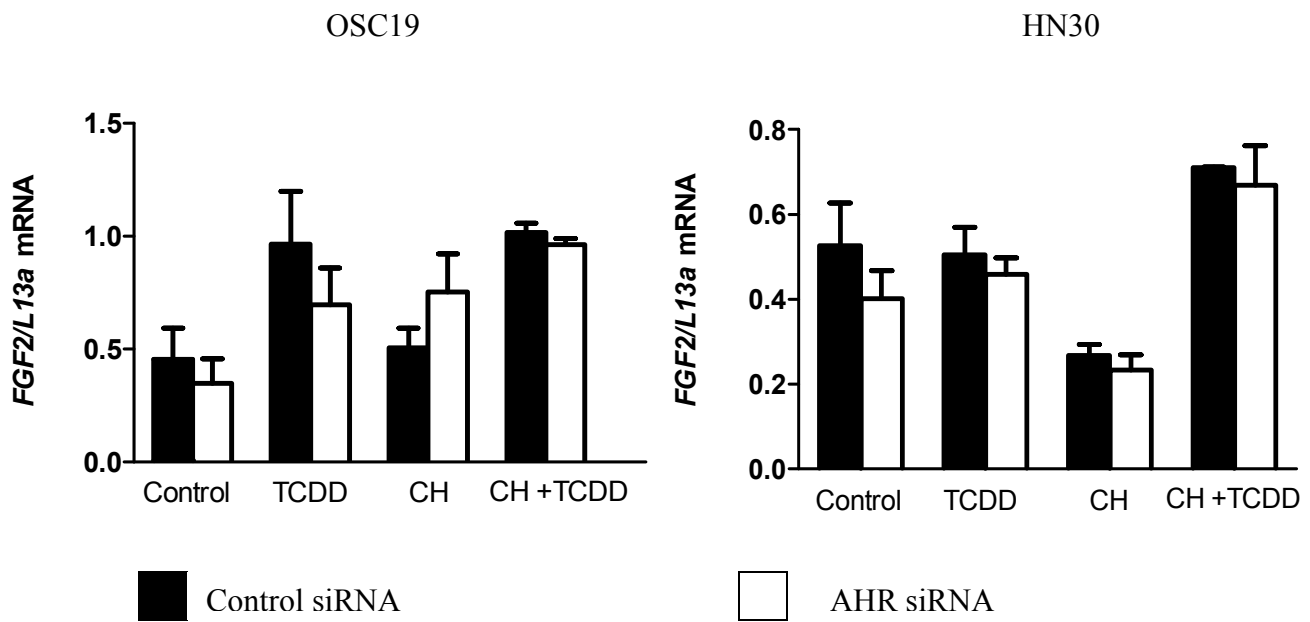

**Figure S7:** siRNA mediated knock down of AHR failed to mitigate both basal and TCDD induced expression of *FGF2* in OSC19 and HN30 cells.

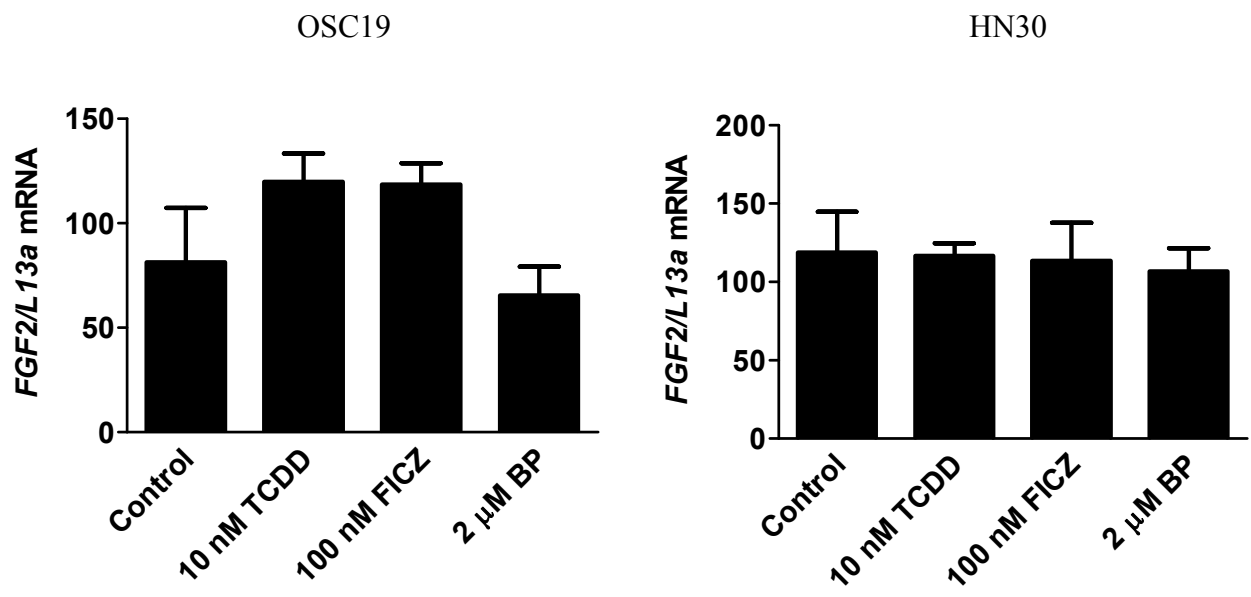

**Figure S8:** Effect of three prototypic AHR agonist on *FGF2* expression.

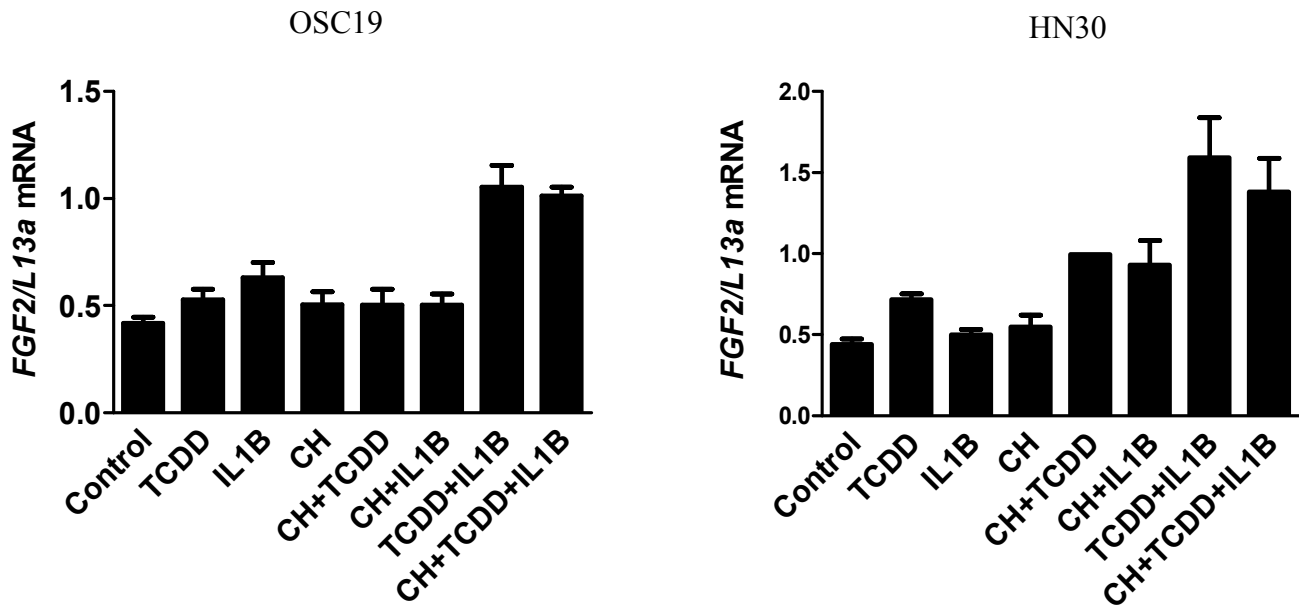

**Figure S9:** TCDD and IL1B in combination significantly induced the expression of *FGF2* in both OSC19 and HN30 cells and CH223191 failed to block TCDD and IL1B mediated induction of *FGF2*.
